1 **Polerovirus N-terminal readthrough domain structures reveal novel**  
2 **molecular strategies for mitigating virus transmission by aphids**

3  
4 Carl J. Schiltz<sup>1,6‡</sup>, Jennifer R. Wilson<sup>2,7‡</sup>, Christopher J. Hosford<sup>1,8</sup>, Myfanwy C. Adams<sup>1</sup>, Stephanie  
5 E. Preising<sup>2</sup>, Stacy L. DeBlasio<sup>2,3</sup>, Hannah J. MacLeod<sup>3,9</sup>, Joyce Van Eck<sup>4,5</sup>, Michelle L. Heck<sup>2,3,5\*</sup>  
6 and Joshua S. Chappie<sup>1,\*</sup>

7  
8 <sup>1</sup> Department of Molecular Medicine, Cornell University, Ithaca, NY, 14853, USA

9 <sup>2</sup> Section of Plant Pathology and Plant-Microbe Biology, School of Integrative Plant Sciences,  
10 Cornell University, Ithaca, NY, 14853, USA

11 <sup>3</sup> USDA-Agricultural Research Service, Emerging Pest and Pathogen Research Unit, Ithaca, NY,  
12 14853, USA

13 <sup>4</sup> Section of Plant Breeding and Genetics, School of Integrative Plant Sciences, Cornell University,  
14 Ithaca, NY 14853, USA

15 <sup>5</sup> Boyce Thompson Institute for Plant Research, Ithaca, NY, 14853, USA

16

17 Present address:

18 <sup>6</sup> Department of Biological Sciences, Vanderbilt University, Nashville, TN, 37232, USA

19 <sup>7</sup> USDA-Agricultural Research Service, Corn, Soybean & Wheat Quality Research Unit, Wooster,  
20 OH, 44691, USA

21 <sup>8</sup> New England Biolabs, Inc., Ipswich, MA, 01938, USA

22 <sup>9</sup> AcceleVir Diagnostics, Baltimore, MD 21202, USA

23

24 \* To whom correspondence should be addressed. Email: [chappie@cornell.edu](mailto:chappie@cornell.edu),  
25 [mlc68@cornell.edu](mailto:mlc68@cornell.edu)

26

27 ‡ Authors contributed equally

28

## 29 **Abstract**

30 Poleroviruses, enamoviruses, and luteoviruses are icosahedral, positive sense RNA viruses that  
31 cause economically important diseases in food and fiber crops. They are transmitted by phloem-  
32 feeding aphids in a circulative manner that involves the movement across and within insect  
33 tissues. The N-terminal portion of the viral readthrough domain (<sup>N</sup>RTD) has been implicated as a  
34 key determinant of aphid transmission in each of these genera. Here, we report crystal structures  
35 of the <sup>N</sup>RTDs from the poleroviruses turnip yellow virus (TuYV) and potato leafroll virus (PLRV) at  
36 1.53-Å and 2.22-Å resolution, respectively. These adopt a two-domain arrangement with a unique  
37 interdigitated topology and form highly conserved dimers that are stabilized by a C-terminal  
38 peptide that is critical for proper folding. We demonstrate that the PLRV <sup>N</sup>RTD can act as an  
39 inhibitor of virus transmission and identify <sup>N</sup>RTD mutant variants that are lethal to aphids.  
40 Sequence conservation argues that enamovirus and luteovirus <sup>N</sup>RTDs will follow the same  
41 structural blueprint, which affords a novel approach to block the spread of these agricultural  
42 pathogens in a generalizable manner.

43

## 44 **Introduction**

45 Poleroviruses (Family: *Solemoviridae*), enamoviruses (Family: *Solemoviridae*) and luteoviruses  
46 (Family: *Tombusviridae*), formerly described as luteovirids but herein referred to as P/E/L viruses,  
47 are insect-vector borne, icosahedral viruses capable of infecting most major crop and biofuel  
48 plants. Their positive-sense RNA viral genomes are roughly 5.8 kb in size and share a conserved  
49 arrangement of the open reading frames that spawn five to nine known gene products<sup>1</sup> (**Fig. S1a**).  
50 These in turn orchestrate plant infection and insect transmission through a series of temporally  
51 and spatially regulated protein interactions<sup>2</sup>. P/E/L viruses are transmitted almost exclusively by  
52 sap-feeding aphid vectors<sup>1,3</sup>. P/E/L virions circulate throughout the aphid body, interacting with  
53 proteins in the aphid's gut and accessory salivary glands prior to transmission to a new host plant.  
54 The aphid gut represents the first barrier for transmission, providing selectivity for the uptake of

55 P/E/L viruses. Virus replication is limited to the plant phloem and no replication occurs in the insect  
56 vector<sup>4</sup>. This mode of transmission is deemed circulative, non-propagative.

57 P/E/L viruses encode two structural proteins<sup>5</sup> (**Fig. S1a**). The coat protein (CP), derived  
58 from ORF3, constitutes the major component of the viral capsid<sup>6</sup>. Stochastic ribosomal  
59 readthrough of the CP stop codon generates a second minor capsid component termed the  
60 readthrough protein (RTP), which contains an additional readthrough domain encoded by ORF5  
61 (RTD) that is fused to the CP C-terminus<sup>6-9</sup>. The leakiness of the CP stop codon has been  
62 maintained throughout evolution and ensures that the RTP is incorporated into the capsid sub-  
63 stoichiometrically<sup>10</sup>: mutant viruses that lack the stop codon and make only the full-length RTP  
64 cannot assemble proper virions, infect plants, or be transmitted by aphid vectors<sup>11-13</sup>. A soluble  
65 form of the RTP that is not associated with the capsid plays a role in phloem limitation and  
66 movement within the plant host<sup>13,14</sup>. The readthrough domain itself can be subdivided into a  
67 globular N-terminal portion (<sup>N</sup>RTD) and an unstructured C-terminal portion (<sup>C</sup>RTD) that undergoes  
68 proteolytic processing as part of the normal viral lifecycle<sup>15,16</sup>. Mutant viruses lacking the RTD are  
69 not aphid transmissible but form functional capsids capable of protecting the RNA genome and  
70 can infect plants at a reduced titer<sup>11,16-18</sup>. In contrast, engineered RTP truncations that remove  
71 only the <sup>C</sup>RTD incorporate efficiently into virions<sup>13</sup>, retain the ability to interact with aphid proteins<sup>19</sup>  
72 and can be transmitted to new hosts<sup>10</sup>. These observations implicate the <sup>N</sup>RTD as a key  
73 determinant of P/E/L virus transmission and necessary for traversing aphid gut epithelial cells  
74 during viral uptake.

75 Previous structural studies have detailed the underlying organization of P/E/L capsids.  
76 Cryo-electron microscopy (cryo-EM) and crystallographic characterization of polerovirus CP  
77 constructs lacking the RTD confirmed that P/E/L viruses assemble with T=3 icosahedral  
78 symmetry<sup>20,21</sup>, which arranges 180 quasiequivalent monomers into closed particles that display  
79 two-fold, three-fold, and five-fold symmetry<sup>22,23</sup> (**Fig. S2a,b**). Despite these efforts, nothing is  
80 known about the structure of the RTD, how it is presented on the capsid, and why it is limited

81 within the mature virion. Deciphering these details is essential for understanding how P/E/L  
82 viruses interact with and are transmitted by their aphid vectors.

83 Here we present atomic-resolution crystal structures of polerovirus<sup>N</sup>RTDs, which define  
84 a two-domain architecture with a unique, interdigitated topology. Our structures rationalize  
85 phenotypes observed in previous mutagenesis studies and provide new insights into the  
86 organization of the RTD on the capsid surface and the factors limiting its incorporation within  
87 mature virions. We also uncover an unexpected evolutionary connection to non-aphid  
88 transmissible tombusviruses, which informs how the presence or absence of specific structural  
89 features correlate with different requirements for transmission to a new host. Functional  
90 experiments establish that the PLRV<sup>N</sup>RTD can act as an inhibitor of virus transmission and  
91 identify<sup>N</sup>RTD mutant variants that function as novel bioinsecticides. We demonstrate several  
92 effective methods for delivering the<sup>N</sup>RTD to aphids, paving the way for a generalized  
93 management strategy to prevent the spread of destructive P/E/L pathogens. Molecular  
94 approaches to block virus transmission are of major interest for the development of novel disease  
95 control technologies<sup>2</sup> and our findings represent a significant advance toward achieving this in an  
96 agricultural setting.

## 97 **Results & Discussion**

### 98 ***Structural organization of polerovirus<sup>N</sup>RTDs provides insights into evolution of aphid*** 99 ***transmission***

100 To understand the molecular interactions regulating polerovirus acquisition and transmission by  
101 aphids, we generated soluble versions of the<sup>N</sup>RTD regions from PLRV (residues 230-458 of the  
102 complete RTP fusion) and TuYV (residues 224-459) that could be expressed in *E. coli* and purified  
103 on the milligram scale for structural and biochemical studies (**Fig. S1b,c**). Size exclusion  
104 chromatography coupled to multi-angle light scattering (SEC-MALS) shows that these constructs

105 form stable dimers in solution (**Fig. S1d,e**). Both readily crystallized, and we solved the structure  
106 of the PLRV<sup>N</sup>RTD at 2.22 Å by single wavelength anomalous diffraction (SAD) phasing<sup>24</sup> using  
107 selenomethionine-labeled protein (**Fig. S3a,b and Table S1**). The TuYV<sup>N</sup>RTD structure was  
108 subsequently solved by molecular replacement<sup>25</sup>, yielding a more complete model that was  
109 refined to 1.53-Å resolution (**Fig. 1 and Table S1**).

110 Each TuYV<sup>N</sup>RTD monomer folds into a two-domain protein comprised of a total of 16 β-  
111 strands. Eleven of these strands form two anti-parallel β-sheets – ordered β12-13-7-16-1-4-5  
112 (sheet 1) and β5-6-14-10 (sheet 2) – that sandwich together into a jellyroll fold (**Fig. 1, orange**).  
113 β5 adopts a twisted conformation that runs orthogonal to the plane of the sandwich and connects  
114 the two sheets along one edge (**Fig. 1a**). The short, β11 strand connects the sheets on the  
115 opposite edge. The additional five strands form an anti-parallel β-sheet (β9-8-15-2-3) that curves  
116 into a small barrel with a short α helix (α1) flanking the edge of β3 (**Fig. 1, purple**). A series of  
117 well resolved loops (L1-L5) connect these segments, with L4 folding over and acting as a lid. We  
118 designate this barrel the ‘cap domain’, as it sits above the jellyroll base. The DALI alignment  
119 algorithm<sup>26</sup> indicates that the cap domain fold is present in a number of unrelated proteins,  
120 including the dimerization domains of aminopeptidases, the N-terminal region of the F1-ATPase  
121 rotary subunits, the *Aeropyrum pernix* IF5B initiation factor, and mammalian *Norovirus* spike  
122 proteins (**Fig. S4**). The topology differs in TuYV, however, as the individual secondary structure  
123 elements are distributed throughout the jellyroll rather than being clustered sequentially as a  
124 single globular unit (**Fig. 1b and S4**). PLRV<sup>N</sup>RTD monomers adopt the same specific domain  
125 arrangement and topology (**Fig. S3a,b**), suggesting this unique organization is a characteristic  
126 feature of polioviruses and, due to sequence conservation in this region, likely enamo- and  
127 luteoviruses as well (**Data S1**).

128 Further structural comparison using DALI<sup>26</sup> reveals that the jellyroll folds of the PLRV and  
129 TuYV<sup>N</sup>RTDs are structurally related to the P domains of tombusviruses, with the nearest

130 structural homologs being tomato bushy stunt virus (TBSV) and cucumber necrosis virus.  
131 Tombusviruses share key biological properties with P/E/L viruses – including a small, positive-  
132 sense single-stranded RNA genome, similar host range, and a non-enveloped icosahedral capsid  
133 with T=3 symmetry comprised of 180 copies of the CP (**Fig. S2a and c**) – but are distinct in that  
134 they not aphid transmissible and lack an analogous readthrough domain. Instead, the viral CP  
135 contains two domains (S and P) that are constitutively expressed as a single polypeptide<sup>27,28</sup>, with  
136 the S domain forming the icosahedral capsid shell and the P domain extending from each  
137 monomer via flexible linker at all points of two-fold rotational symmetry within the assembled virion  
138 (**Fig. S2c,d**). While previous cryo-EM studies demonstrated structural homology between  
139 polerovirus CPs and tombusvirus S domains (**Fig. S2e**), structural superposition here shows that  
140 the TBSV P domain aligns with the jelly roll domain of each <sup>N</sup>RTD but lacks the corresponding  
141 segments that make up the cap domain (**Figs. 1c,d and S3c**). The conserved topologies between  
142 both families (**Fig. 1b and d**) and the intricate distribution of cap domain segments throughout  
143 the primary sequence (**Data S1**) suggest that poleroviruses may be ancestral to tombusviruses,  
144 with tombusviruses likely evolving via the gradual loss of cap domain elements and truncation of  
145 loops L1-L5 rather than through the concerted acquisition of these segments in a manner that  
146 would be constrained by the proper folding of both domains.

147 We also observe a largely unstructured peptide (the ‘C peptide’) extending from  $\beta$ 16 in the  
148 TuYV <sup>N</sup>RTD, which transverses sheet 1 and terminates in a final strand ( $\beta$ 17) that packs against  
149  $\beta$ 12 in an antiparallel orientation (**Fig. 1a,b, marine**). From the electron density, we can define  
150 the sequence of this segment unambiguously as the C-terminal portion of the construct (residues  
151 431-459) (**Fig. S5a**). A disconnected fragment of the C peptide (residues 442-445) is resolved in  
152 the PLRV structure (**Fig. S5b**), likely owing to partial proteolytic cleavage and dissociation of the  
153 liberated fragment during purification and/or crystallization.

154 ***The C peptide stabilizes the <sup>N</sup>RTD dimer interface***

155 PLRV and TuYV<sup>N</sup>RTDs crystallize as dimers (**Fig. S1f,g**), consistent with their stoichiometry in  
156 solution. Individual monomers superimpose with an overall RMSD ranging from 1.12-1.42 Å  
157 across all atoms, with the L2, β4-β5, and β13-β14 loops and portions of the C peptide exhibiting  
158 the greatest degree of structural variability (**Fig. S3d,e**). Within each dimer, <sup>N</sup>RTD monomers are  
159 oriented parallel to the dimer symmetry axis with the sheet 1 side of the jelly roll facing inward  
160 (**Figs. 2a,b and S6a,b**). Cap domain loops L4 and L5 form the upper portion of the TuYV dimer  
161 interface, with main chain atoms and residues E315, H356, E360, N362, and Y410 (H362, E366,  
162 N368, S369, and Y415 in PLRV) making hydrogen bonds *in trans* (**Figs. 2c,d and S6c,d**).  
163 Interacting side chains from β12, L2, and β9 provide additional contacts at the edges of the dimer  
164 (**Figs. 2d and S6d**). The C peptides snake up from the bottom of the TuYV jelly roll, filling the  
165 large cavity beneath the cap domains before exiting in opposite directions to wrap around sheet  
166 2 (**Fig. S5c**). The R440 and R443 side chains anchor an extensive network of stabilizing hydrogen  
167 bonds and hydrophobic interactions along interior of the structure while β17 serves a similar role  
168 on the exterior (**Figs. 2e and S5d**). Together, the C peptides increase the total buried surface  
169 area from 908 Å<sup>2</sup> to 3615 Å<sup>2</sup>, constituting a major driving force of dimerization. Although we only  
170 resolve a partial fragment from one C peptide in the PLRV <sup>N</sup>RTD dimer structure (**Figs. S5b and**  
171 **S6a,b**), this piece forms similar stabilizing interactions with both monomers (**Figs. S5d and S6e**).  
172 Deletion of the C peptide from either <sup>N</sup>RTD expression construct renders the resulting proteins  
173 insoluble. ConSurf analysis<sup>29</sup> shows that residues directly contacting the TuYV C peptides are  
174 highly conserved across all P/E/L viruses (**Fig. S7 and Data S1**), signifying the general  
175 importance of these interactions as they are maintained throughout the evolution and adaptation  
176 of all three genera. Interestingly, a C-terminal truncation of the CABYV RTP terminating  
177 immediately after the C peptide can be efficiently incorporated into mature virions whereas  
178 mutants disrupting the anchoring arginines cannot<sup>13</sup> (**Fig. S5e**). Together these data underscore  
179 the critical role the C peptide plays in the proper folding and stability of the <sup>N</sup>RTD dimer.

180 **Disruption of<sup>N</sup>RTD folding and stability impairs transmission of mutant viruses**

181 Viral mutants have played an integral part in advancing our understanding of P/E/L virus biology,  
182 particularly with regard to movement, uptake, and transmission. Our data afford the opportunity  
183 to re-examine these perturbations in a structural context and, consequently, reinterpret the  
184 associated phenotypes. Systematic deletion of conserved residues throughout the PLRV<sup>N</sup>RTD  
185 previously yielded some mutants where the RTP was not incorporated into the assembled virion  
186 and other mutants that were incorporated but were not aphid transmissible<sup>14</sup> (**Table S2**). Many of  
187 the mutated side chains are buried and form stabilizing hydrogen bonding and hydrophobic  
188 interactions (**Fig. S8a,b**), suggesting that the triplet deletions interfere with the structural integrity  
189 and folding of the<sup>N</sup>RTD dimer. To test this hypothesis, we introduced a subset of the triple deletion  
190 and triple alanine mutations from previous studies into our PLRV<sup>N</sup>RTD construct (unincorporated:  
191 <sup>241</sup>PML<sup>243</sup>, <sup>409</sup>YNY<sup>411</sup>; incorporated: <sup>233</sup>RFI<sup>235</sup>, <sup>268</sup>EDE<sup>270</sup>, <sup>315</sup>SST<sup>317</sup>) and examined the solubility of  
192 the resulting proteins. Western blot analysis was used to detect the<sup>N</sup>RTD in the soluble  
193 (supernatant) and insoluble (pellet) fractions following recombinant expression in *E. coli*. The two  
194 non-incorporated mutants (PML and YNY) were insoluble in this context, as neither was detected  
195 in the supernatant (**Fig. S8d,e**). The incorporated EDE mutants were similarly insoluble while the  
196 SST mutants were partially soluble. Only the  $\Delta$ RFI mutant remained soluble though a triple  
197 alanine mutant at this same position was not. These observations argue that the *in vivo* defects  
198 associated with mutant viruses arise from disruption of the proper folding and/or stability of the  
199<sup>N</sup>RTD, which is critical for aphid transmission.

200 Point mutations in the RFI, EDE, and YNY motifs produced similar transmission defects  
201 in TuYV<sup>30</sup> (**Table S2**). An alanine substitution at R227 (R233 in PLRV RFI triplet) reduced  
202 transmission while a double alanine mutant at E262 and D263 (E268 and D269 in PLRV EDE  
203 triplet) was only transmissible after microinjection, meaning the mutant virus was unable to  
204 traverse the aphid gut. As in PLRV, these side chains participate in a network of hydrogen bonds  
205 that stretches between  $\beta$ 1,  $\beta$ 4 and  $\beta$ 6 and buttresses sheets 1 and 2 at the bottom of the jellyroll



206 domain (**Fig. S8b,c**). Interestingly, a compensatory second site mutation converting proline 235  
207 to a leucine restores both the infectivity and transmission of the R227A and E262A/E263A TuYV  
208 mutants<sup>30</sup> (**Table S2**). P235 sits in an unstructured segment between  $\beta$ 1 in the jelly roll domain  
209 and  $\beta$ 2 in the cap domain, facing into a hydrophobic pocket lined with F259, I288, I421, and I424  
210 (**Fig. S8c**). We speculate that a leucine substitution at this position would alter the overall  
211 secondary structure and/or strengthen the existing hydrophobic interactions to keep the cap  
212 domain in place, ultimately overcoming any instability in the distal portions of the fold.

213 The K403A/Y404D (Y409 in PLRV YNY triplet) double mutant also showed reduced TuYV  
214 transmission, which could be improved by microinjection<sup>30</sup>. These conserved side chains lie on  
215 the edge of the cap domain in both structures where K403 helps anchor L4 and Y404 lines the  
216 wall of a cavity on the surface (**Figs. S7d and S8c**). Revertant mutations switching Y404D back  
217 to a tyrosine or structurally similar phenylalanine rescue the transmission defect, suggesting a pi-  
218 cation interaction with Q399 is important for the stabilization of this region of the protein<sup>31</sup>.

### 219 ***<sup>N</sup>RTD architecture does not limit stoichiometry in the context of the mature virion***

220 Stochastic ribosomal readthrough of the CP stop codon sub-stoichiometrically limits the amount  
221 of RTD that is translated, and, hence, present for incorporation into mature, infectious virions<sup>32</sup>.  
222 Why the stop codon has been evolutionarily maintained in the virus genome despite the critical  
223 role for the <sup>N</sup>RTD in aphid transmission is unknown. Leveraging the observed homology with  
224 tombusvirus S and P domains (**Figs. 1, S2, and S3c**), we modelled the organization of the <sup>N</sup>RTD  
225 on the capsid surface to identify possible restraints on virion assembly (**Fig. 3**). Tombusvirus P  
226 domains are constitutively translated and tethered to each S domain via an unstructured linker  
227 (**Fig. 3a**). When assembled, the P domains occupy every two-fold symmetry axis in the T=3  
228 icosahedral capsid (**Figs. 3b and S2c**). We anticipate that intact RTPs encoded by P/E/L viruses  
229 will follow the same architectural design but with the added constraint of head-to-head <sup>N</sup>RTD  
230 dimerization imposed. A composite model combining the TuYV <sup>N</sup>RTD and CP (PDB: 6RTK)

231 coordinates suggests a similar overall connectivity (**Fig. 3c**), with the <sup>N</sup>RTD dimer situated about  
232 the two-fold symmetry axis but rotated approximately 15° relative to the position of the TBSV P  
233 domains (**Fig. 3d-f**). This organization confirms previous predictions that special interactions  
234 stabilize the association of icosahedral asymmetric units (**Fig. 3f, black triangles**) across the  
235 two-fold axis of symmetry and may contribute to the overall pathway of virion assembly<sup>21</sup>.  
236 Importantly, we note no steric clashing if this RTP model is placed at each position in the T=3  
237 icosahedral asymmetric unit (**Fig. 3g**). This implies that the <sup>N</sup>RTD could feasibly occupy every  
238 two-fold position in a poliovirus capsid and that the architecture of the <sup>N</sup>RTD itself does not  
239 intrinsically limit its stoichiometry. The proximity of this arrangement, however, might be  
240 problematic in that it could promote aggregation and/or collision between the disordered C-  
241 terminal region of the RTD in neighbouring subunits, ultimately destabilizing the structure or  
242 masking segments of the RTD that may interact with aphid receptors. We speculate that the leaky  
243 CP stop codon is therefore preserved to ensure a low concentration of this bulky C-terminal  
244 extension on the virion surface. <sup>N</sup>RTD dimerization might also impose kinetic constraints that  
245 further limit RTP incorporation into the capsid if the timescale of folding is slower than the rate of  
246 CP assembly.

#### 247 ***<sup>N</sup>RTD can function as an inhibitor of viral transmission***

248 A soluble version of the tomato spotted wilt virus (Genus: *Orthospovirus*; Family: *Tospoviridae*)  
249 membrane surface glycoprotein G<sub>N</sub> was shown in feeding experiments to inhibit viral transmission  
250 by its insect vector, the western flower thrips, *Frankliniella occidentalis*<sup>33,34</sup>. Given the important  
251 role of the <sup>N</sup>RTD in aphid transmission, we asked whether the purified PLRV <sup>N</sup>RTD dimer could  
252 similarly compete with the mature virus for binding to aphid tissues and subsequently hinder its  
253 uptake and transmission by its primary vector, the green peach aphid, *Myzus persicae*. To test  
254 this, we first exposed *M. persicae* to the purified <sup>N</sup>RTD in an artificial diet feeding system prior to  
255 PLRV acquisition and then monitored the subsequent transmission to healthy plants (**Fig. S9**).

256 Transmission of PLRV to potato was significantly decreased under these conditions as compared  
257 to the no protein control (**Fig. 4a, Table S3, Table S4**,  $P = 0.046$ , likelihood ratio test), despite the  
258 fact that oral delivery of the same concentration of the purified bovine serum albumin (BSA)  
259 control significantly increased transmission ( $P = 0.035$  compared to the no protein control;  $P <$   
260  $0.0001$  compared to <sup>N</sup>RTD, likelihood ratio test), a well-described phenotype in the literature  
261 observed for proteins unrelated to aphids or virus transmission, including BSA, casein, lysozyme  
262 and cytochrome C<sup>35</sup>.

263 Next, we tested whether transient expression of the <sup>N</sup>RTD *in planta* using *Agrobacterium*  
264 *tumefaciens* would also block virus transmission (**Fig. S10**). Expression tests and western blot  
265 analysis showed that the PLRV <sup>N</sup>RTD requires a small protein tag to facilitate folding *in planta*  
266 (**Fig. S10a-d**), an unsurprising finding as native <sup>N</sup>RTD would be fused to the CP on its N-terminus  
267 and the <sup>C</sup>RTD on its C-terminus. *M. persicae* were allowed to feed on *Nicotiana benthamiana*  
268 leaves transiently expressing YFP-tagged PLRV <sup>N</sup>RTD before testing their ability to transmit virus  
269 (**Fig. S10e**). We tested both N-terminal and C-terminal YFP tags and found that aphids pre-  
270 exposed to the YFP-<sup>N</sup>RTD by this delivery method also had a decreased ability to transmit virus  
271 (**Fig. S4b, Tables S5 and S6**,  $P = 0.011$  compared to uninfiltrated control, likelihood ratio test).

272 Considering the promising results of transient *in planta* expression, we generated  
273 transgenic potato plants constitutively expressing YFP-<sup>N</sup>RTD under the control of the cauliflower  
274 mosaic virus (CaMV) 35S constitutive promoter. Expression of YFP-<sup>N</sup>RTD in these plants was  
275 confirmed via western blot analysis, RT-PCR, and fluorescence confocal microscopy (**Fig S11a-**  
276 **c**). YFP signal was observed along the cell periphery and in the nucleus of the YFP-<sup>N</sup>RTD  
277 transgenics but not in the empty vector controls (**Fig. S11c**). *M. persicae* were exposed to  
278 transgenic leaves for 48 hours as in previous experiments and then PLRV titer in aphids was  
279 quantified by droplet digital PCR (**Fig. S11d**) and their ability to transmit PLRV was assessed  
280 (**Fig. S11e**). Aphids exposed to YFP-<sup>N</sup>RTD acquired significant fewer copies of PLRV (**Fig. 4c**,  $P$   
281  $= 0.038$ , unpaired one-sided Student's *t* test) and had a reduced ability to transmit PLRV (**Fig. 4d**,

282 **Tables S7 and S8**,  $P = 0.044$ , likelihood ratio test). These results are consistent with the  
283 outcomes from the other delivery strategies and show that the reduction in PLRV transmission is  
284 likely due to the reduced ability of aphids to acquire virions across the midgut barrier.

285 A meta-analysis of our data found that pre-treatment of aphids with the PLRV <sup>N</sup>RTD  
286 significantly reduced the chances of a plant from becoming infected by nearly half (risk ratio of  
287 0.55) with the 95% confidence interval ranging from a 25% reduction in infection (risk ratio of 0.75)  
288 to a 60% reduction (risk ratio of 0.40, **Fig. S12**) regardless of delivery route. There was remarkably  
289 low heterogeneity between experiments and even among delivery methods ( $I^2 = 0\%$ ,  $\tau^2 = 0$ ,  $P =$   
290 0.42, Cochran's Q test), indicating that this effect is highly reproducible even when using different  
291 delivery strategies. These results argue that the isolated <sup>N</sup>RTD can function as an inhibitor of viral  
292 transmission.

293 To test whether the <sup>N</sup>RTD interferes with virus transmission when delivered to the  
294 accessory salivary glands, aphids were microinjected with the purified PLRV <sup>N</sup>RTD prior to  
295 performing the transmission assay (**Fig. S13**). Microinjection bypasses the gut and delivers <sup>N</sup>RTD  
296 directly to the aphid body cavity, which facilitates possible interactions with the accessory salivary  
297 glands<sup>30</sup>. No change in transmission was observed when two different concentrations of purified  
298 <sup>N</sup>RTD were microinjected into the hemocoel (**Fig. 4e, Tables S9 and S10**,  $P = 0.694$  compared  
299 to no protein control;  $P = 0.820$  compared to BSA control, likelihood ratio test), supporting the  
300 hypothesis that the ability of the <sup>N</sup>RTD alone to interfere with virus transmission occurs at the gut  
301 and not the accessory salivary glands.

302

### 303 ***Cap domain mutants are lethal to aphids***

304 Our modelling suggests that the cap domain is poised to make direct contact with receptors in the  
305 aphid gut. We reasoned that mutating surface-exposed side chains within this domain would  
306 disrupt critical interactions needed for viral uptake and thus could impair the ability of the <sup>N</sup>RTD to  
307 function as an inhibitor in our transmission assays. To test this hypothesis, we introduced a series

308 of alanine substitutions into the PLRV<sup>N</sup>RTD, including point mutations at non-conserved residues  
309 H321, E366, H371, E374, and a “cluster” mutant containing three mutations at N368, C370, and  
310 Y411, which form a highly conserved pocket (**Fig. 5a**). These positions were chosen as they do  
311 not interfere with<sup>N</sup>RTD dimerization and folding. <sup>N</sup>RTD mutants were purified and delivered to  
312 aphids via artificial diet feeding prior to PLRV acquisition and then viral transmission to healthy  
313 plants was measured by ELISA (**Fig. S9b**). As predicted, the H321A mutation interfered with the  
314 inhibitor function of the<sup>N</sup>RTD and did not significantly decrease PLRV transmission compared to  
315 the no protein control ( $P = 0.817$ ; likelihood ratio test) (**Fig. 4a**). This behavior was distinct from  
316 the increase in transmission observed with the BSA control (**Fig. 4a**, compared to BSA,  $P = 0.140$ ,  
317 likelihood ratio test), providing further support that the observed phenotypes are specific for the  
318 <sup>N</sup>RTD and not a general consequence of ingesting protein.

319 While attempting to assay the other cap domain mutants, we noted that aphids died at a  
320 significant rate. To quantify this mortality, aphids were fed the<sup>N</sup>RTD mutants via an artificial diet  
321 and then moved to either PLRV-infected or uninfected HNS leaves for 24 hours after which the  
322 numbers of live and dead insects were counted (**Fig. S9c, Table S11**). E366A, H371A, E374A,  
323 and the cluster mutant all caused significant mortality (**Fig. 5b, Table S12**,  $P < 0.001$  for all four  
324 mutants, respectively, as compared to no protein control), with E374A and the cluster mutant  
325 having the strongest effects. Aphids died even when transferred from the<sup>N</sup>RTD mutant laden diet  
326 treatments to uninfected leaves (**Fig. 5b**), showing that the observed mortality was linked  
327 exclusively to the purified<sup>N</sup>RTD variants and independent of infectious virus.

328 The H321A mutant did not cause significant aphid death when compared to no protein  
329 and BSA controls ( $P > 0.44$ ) (**Fig. 5b**). The fact that this mutation localizes to a different region of  
330 the cap domain (**Fig. 5a**) and has different effects with respect to viral transmission and aphid  
331 mortality hints that the<sup>N</sup>RTD interacts with the aphid gut in a structure-specific manner.  
332 Differential binding of the WT<sup>N</sup>RTD and the mutants to various aphid proteins is one hypothesis  
333 that may explain both the transmission assay and aphid mortality data. Regardless of the

334 mechanism, the ability of these mutants to kill aphids means they can be deployed as novel  
335 biopesticides, either through transgenic plant delivery as described above for the wild-type<sup>N</sup>RTD  
336 or via some other delivery strategy.

### 337 **Conclusions**

338 Our work here defines the basic structural organization of polerovirus<sup>N</sup>RTDs and provides a  
339 model for how the RTP is incorporated into the mature virion. Polerovirus<sup>N</sup>RTDs adopt an  
340 interdigitated two-domain architecture and form dimers that are stabilized by a C-terminal peptide.  
341 The requirement for dimerization suggests that the<sup>N</sup>RTD is situated on the two-fold symmetry  
342 axis of the icosahedral viral capsid. Our modeling, however, suggests that this arrangement does  
343 not intrinsically limit the stoichiometry of the RTD within the mature virus, which instead may be  
344 a consequence of potential<sup>C</sup>RTD aggregation and/or kinetic constraints imposed by<sup>N</sup>RTD folding  
345 and dimerization. Our data also rationalize the effects of various RTD mutants that have been  
346 reported over the last several decades<sup>16,18,36-38</sup>. We now can attribute the observed transmission  
347 defects associated with different deletions and truncations to the production of insoluble forms of  
348 the<sup>N</sup>RTD.

349 Further structural comparisons revealed an unexpected evolutionary connection to  
350 tombusviruses, intimating that poleroviruses more closely resemble a common ancestor and that  
351 loss of the cap domain decouples a virus from its obligate vector and coincides with the ability to  
352 be transmitted in other ways. In 2021, the International Committee on Taxonomy of Viruses  
353 abolished the previous designation of P/E/L viruses as a single family, *Luteoviridae*,  
354 recategorizing luteoviruses as *Tombusviridae* and poleroviruses and enamoviruses as  
355 *Solemoviridae* based solely on differences in their respective RNA-dependent RNA  
356 polymerases<sup>39</sup>. Our data argue that P/E/L viruses are in fact structurally and mechanistically  
357 distinct from other members of these families and should therefore be treated as a separate group  
358 when considering the assembly and organization of the capsid and the mode of transmission.

359           There are presently no treatments to cure plants of polerovirus infections and current  
360 methods to breed viral disease-resistant crops or to control aphid vector populations have proven  
361 ineffectual to manage these viruses in the field. Our functional experiments demonstrate that the  
362 purified PLRV<sup>N</sup>RTD can act as an inhibitor to reduce its vector transmission, not only in the  
363 context of artificial diet feeding in the laboratory but also when but delivered transgenically *in*  
364 *planta* in the greenhouse. This provides a novel strategy for controlling these insect-transmitted  
365 viruses that can be deployed for widespread field application pending regulatory approval. The  
366 high degree of sequence conservation across the jelly roll and cap domains, particularly in regions  
367 contacting the C peptide, implies that enamovirus and luteovirus<sup>N</sup>RTDs will follow the same  
368 structural blueprint and that this inhibitor-based approach could be extended to mitigate these  
369 agricultural pathogens as well. Moreover, we show that certain point mutations in the cap domain  
370 are lethal to the insect vector, indicating we have discovered a novel biopesticide with many  
371 possible permutations and the use of transgenic plants as an already proven delivery strategy.  
372 The deployment of genetically-encoded insecticidal and viral transmission-blocking proteins to  
373 crop plants lies at the forefront of agricultural technology<sup>40,41</sup> and may one day eliminate the need  
374 for environmentally harmful and costly pesticide applications. Our work here represents a major  
375 step forward toward achieving this end.

376           Taken together, our findings advance our fundamental understanding of plant virology and  
377 vector biology and impart new tools that can be used to thwart both vector-borne phytoviruses  
378 and an economically damaging group of insects.

379

#### 380 **Data Availability**

381 The atomic coordinates of the TuYV and PLRV<sup>N</sup>RTD structures are deposited in the Protein Data  
382 Bank with accession numbers 7ULN and 7ULO respectively. All other data, results, and reagents  
383 are available from the corresponding authors upon reasonable request.

## 384 **Acknowledgements**

385 We thank the Northeastern Collaborative Access Team (NE-CAT) beamline staff at the Advanced  
386 Photon Source (APS) for assistance with remote X-ray data collection, Dr. Lynn Johnson from  
387 the Cornell Statistical Consulting Unit for assistance with statistical methodologies and the meta-  
388 analysis of <sup>N</sup>RTD inhibitor functions, Maria Gutierrez-Feliciano (BTI) for maintenance of plants  
389 and insects, and Dr. Mamta Srivastava (BTI) for technical assistance with imaging. We also thank  
390 Kerry Swartwood (BTI) for potato transformation and Dr. Mariko Alexander (Cornell) for helping  
391 to initiate the collaboration that led to this work. Research conducted at the NE-CAT beamlines  
392 (24-ID-C and 24-ID-E) supported by NIH [P41 GM103403, S10 RR029205] and carried out under  
393 the general user proposal GUP-51113 (PI: J.S.C). This research also used resources of the  
394 Advanced Photon Source, a U.S. Department of Energy (DOE) Office of Science User Facility  
395 operated for the DOE Office of Science by Argonne National Laboratory under Contract No. DE-  
396 AC02-06CH11357. Confocal microscopy images were taken at the BTI Plant Cell Imaging Center,  
397 which is supported by the NSF (DBI-0618969). This work was supported by United States  
398 Department of Agriculture Grant 2019-05200 (to M.H. and J.S.C.) and USDA ARS CRIS Project  
399 8062-22410-007-000-D (to M.H.). J.S.C. is a Meinig Family Investigator in the Life Sciences.  
400 J.R.W. was supported by a NSF Graduate Research Fellowship (DGE-1650441) and a NIFA  
401 Predoctoral Fellowship (2019-67011-29610). M.C.A. is supported by a NIFA Predoctoral  
402 Fellowship (2020-67034-31750). Funding for this research was also provided by the Schmittau  
403 Novak Small Grants Program from the Cornell School of Integrative Plant Sciences (to J.R.W.  
404 and C.J.S.).

## 405 **Author Contributions**

406 C.J.S., J.R.W., M.H. and J.S.C. designed the study and analysed data. C.J.S., C.J.H., and M.C.A.  
407 purified and crystallized all <sup>N</sup>RTD constructs and collected X-ray diffraction data. C.J.S. solved  
408 the <sup>N</sup>RTD structures and built the models with assistance from M.C.A. and J.S.C. J.S.C. carried



409 out computational modelling. C.J.S. generated and purified all N-RTD mutants. M.C.A performed  
410 additional N-RTD protein purifications. J.R.W. conducted nearly all aphid experiments, including  
411 microinjection, artificial diet, and transient *in planta* delivery transmission assays as well as the  
412 mortality assays. J.R.W. generated all expression constructs for transient *in planta* delivery and  
413 potato transformation. J.V.E. generated the transgenic potato plants. S.E.P. validated and  
414 performed experiments on the transgenic potato plants with microscopy assistance from S.L.D.  
415 H.J.M. completed and analysed data for additional transmission assays. J.R.W. and M.L.H.  
416 conducted statistical analysis on all aphid experiments. C.J.S., J.R.W., M.H., and J.S.C. wrote the  
417 manuscript. M.H., J.S.C., J.R.W., C.J.S. and M.C.A obtained funding to support the research.

418

#### 419 **Ethics Declarations**

420 M.L.H., J.S.C., J.R.W., C.J.S., and M.C.A have a patent filing related to the technologies  
421 described in this paper (U.S. Provisional Patent Application Serial No. 63/289,790).

422

## 423 REFERENCES

- 424 1 Wilson, J. R., DeBlasio, S. L., Alexander, M. M. & Heck, M. Looking through the lens of  
425 'omics technologies: Insights into the transmission of insect vector-borne plant viruses.  
426 *Curr Issues Mol Biol* **34**, 113-144, doi:10.21775/cimb.034.113 (2019).
- 427 2 Heck, M. & Brault, V. Targeted disruption of aphid transmission: a vision for the  
428 management of crop diseases caused by *Luteoviridae* members. *Curr Opin Virol* **33**, 24-  
429 32, doi:10.1016/j.coviro.2018.07.007 (2018).
- 430 3 Gray, S., Cilia, M. & Ghanim, M. Circulative, "nonpropagative" virus transmission: an  
431 orchestra of virus-, insect-, and plant-derived instruments. *Adv Virus Res* **89**, 141-199,  
432 doi:10.1016/B978-0-12-800172-1.00004-5 (2014).
- 433 4 Pinheiro, P. V. *et al.* Plant viruses transmitted in two different modes produce differing  
434 effects on small RNA-mediated processes in their aphid vector. *Phytobiomes* (2019).
- 435 5 Miller, W. A., Dinesh, K. S. P. & Paul, C. P. Luteovirus gene expression. *Crit. Rev. Pl.*  
436 *Sci.* **14**, 179-211 (1995).
- 437 6 Dinesh-Kumar, S. P., Brault, V., Allen & Miller, W. Precise mapping and *in vitro*  
438 translation of a trifunctional subgenomic RNA of barley yellow dwarf virus. *Virology* **187**,  
439 711-722, doi:10.1016/0042-6822(92)90474-4 (1992).
- 440 7 Bahner, I., Lamb, J., Mayo, M. A. & Hay, R. T. Expression of the genome of potato  
441 leafroll virus: readthrough of the coat protein termination codon *in vivo*. *Journal of*  
442 *General Virology* **71**, 2251-2256, doi:10.1099/0022-1317-71-10-2251 (1990).
- 443 8 Cheng, S. L., Domier, L. L. & D'Arcy, C. J. Detection of the readthrough protein of barley  
444 yellow dwarf virus. *Virology* **202**, 1003-1006, doi:10.1006/viro.1994.1427 (1994).
- 445 9 Filichkin, S. A., Lister, R. M., McGrath, P. F. & Young, M. J. *In vivo* expression and  
446 mutational analysis of the barley yellow dwarf virus readthrough gene. *Virology* **205**,  
447 290-299, doi:10.1006/viro.1994.1645 (1994).
- 448 10 Wang, J. Y., Chay, C., Gildow, F. E. & Gray, S. M. Readthrough protein associated with  
449 virions of barley yellow dwarf luteovirus and its potential role in regulating the efficiency  
450 of aphid transmission. *Virology* **206**, 954-962, doi:10.1006/viro.1995.1018 (1995).
- 451 11 Liang, D., Gray, S. M., Kaplan, I. & Palukaitis, P. Site-directed mutagenesis and  
452 generation of chimeric viruses by homologous recombination in yeast to facilitate  
453 analysis of plant-virus interactions. *Mol Plant Microbe Interact* **17**, 571-576,  
454 doi:10.1094/MPMI.2004.17.6.571 (2004).
- 455 12 Lee, L. *et al.* A surface loop of the potato leafroll virus coat protein is involved in virion  
456 assembly, systemic movement, and aphid transmission. *Journal of Virology* **79**, 1207-  
457 1214, doi:10.1128/JVI.79.2.1207-1214.2005 (2005).
- 458 13 Boissinot, S., Erdinger, M., Monsion, B., Ziegler-Graff, V. & Brault, V. Both structural and  
459 non-structural forms of the readthrough protein of cucurbit aphid-borne yellows virus are

- 460 essential for efficient systemic infection of plants. *PLoS ONE* **9**, e93448,  
461 doi:10.1371/journal.pone.0093448 (2014).
- 462 14 Peter, K. A., Liang, D., Palukaitis, P. & Gray, S. M. Small deletions in the potato leafroll  
463 virus readthrough protein affect particle morphology, aphid transmission, virus  
464 movement and accumulation. *J Gen Virol* **89**, 2037-2045, doi:10.1099/vir.0.83625-0  
465 (2008).
- 466 15 Alexander, M. M. *et al.* Insights in luteovirid structural biology guided by chemical cross-  
467 linking and high resolution mass spectrometry. *Virus Res* **241**, 42-52,  
468 doi:10.1016/j.virusres.2017.05.005 (2017).
- 469 16 Brault, V. *et al.* Aphid transmission of beet western yellows luteovirus requires the minor  
470 capsid read-through protein P74. *Embo J.* **14**, 650-659 (1995).
- 471 17 Reutenauer, A. *et al.* Identification of beet western yellows luteovirus genes implicated in  
472 viral replication and particle morphogenesis. *Virology* **195**, 692-699 (1993).
- 473 18 Chay, C. A., Gunasinge, U. B., Dinesh-Kumar, S. P., Miller, W. A. & Gray, S. M. Aphid  
474 transmission and systemic plant infection determinants of barley yellow dwarf luteovirus-  
475 PAV are contained in the coat protein readthrough domain and 17-kDa protein,  
476 respectively. *Journal of Virology* **219**, 57-65, doi:10.1006/viro.1996.0222 (1996).
- 477 19 Mulot, M. *et al.* Transmission of turnip yellows virus by *Myzus persicae* is reduced by  
478 feeding aphids on double-stranded RNA targeting the ephrin receptor protein. *Front*  
479 *Microbiol* **9**, 457, doi:10.3389/fmicb.2018.00457 (2018).
- 480 20 Byrne, M. J. *et al.* Combining transient expression and cryo-EM to obtain high-resolution  
481 structures of luteovirid particles. *Structure* **27**, 1761-1770.e1763,  
482 doi:10.1016/j.str.2019.09.010 (2019).
- 483 21 Adams, M. C., Schiltz, C. J., Heck, M. L. & Chappie, J. S. Crystal structure of the potato  
484 leafroll virus coat protein and implications for viral assembly. *Journal of Structural*  
485 *Biology* **214**, 107811 (2022).
- 486 22 Johnson, J. E. & Speir, J. A. Quasi-equivalent viruses: a paradigm for protein  
487 assemblies. *Journal of molecular biology* **269**, 665-675 (1997).
- 488 23 Prasad, B. & Schmid, M. F. Principles of virus structural organization. *Viral Molecular*  
489 *Machines*, 17-47 (2012).
- 490 24 Hendrickson, W. A. Anomalous diffraction in crystallographic phase evaluation. *Q Rev*  
491 *Biophys* **47**, 49-93, doi:10.1017/S0033583514000018 (2014).
- 492 25 Bunkóczi, G. *et al.* Phaser. MRage: automated molecular replacement. *Acta*  
493 *Crystallographica Section D: Biological Crystallography* **69**, 2276-2286 (2013).
- 494 26 Holm, L. & Rosenstrom, P. DALI server: conservation mapping in 3D. *Nucleic Acids Res*  
495 **38**, W545-549, doi:10.1093/nar/gkq366 (2010).

- 496 27 Harrison, S. C., Olson, A. J., Schutt, C. E., Winkler, F. K. & Bricogne, G. Tomato bushy  
497 stunt virus at 2.9 Å resolution. *Nature* **276**, 368-373 (1978).
- 498 28 Olson, A. J., Bricogne, G. & Harrison, S. C. Structure of tomato bushy stunt virus IV. The  
499 virus particle at 2.9 Å resolution. *J Mol Biol* **171**, 61-93 (1983).
- 500 29 Ashkenazy, H. *et al.* ConSurf 2016: an improved methodology to estimate and visualize  
501 evolutionary conservation in macromolecules. *Nucleic Acids Res* **44**, W344-350,  
502 doi:10.1093/nar/gkw408 (2016).
- 503 30 Brault, V. *et al.* Effects of point mutations in the readthrough domain of the beet western  
504 yellows virus minor capsid protein on virus accumulation in planta and on transmission  
505 by aphids. *J Virol* **74**, 1140-1148 (2000).
- 506 31 Burley, S. K. & Petsko, G. A. Amino-aromatic interactions in proteins. *FEBS Lett* **203**,  
507 139-143, doi:10.1016/0014-5793(86)80730-x (1986).
- 508 32 Xu, Y. *et al.* A stem-loop structure in potato leafroll virus open reading frame 5 (ORF5) is  
509 essential for readthrough translation of the coat protein ORF stop codon 700 bases  
510 upstream. *J Virol* **92**, doi:10.1128/JVI.01544-17 (2018).
- 511 33 Whitfield, A. E., Ullman, D. E. & German, T. L. Expression and characterization of a  
512 soluble form of tomato spotted wilt virus glycoprotein G<sub>N</sub>. *Journal of virology* **78**, 13197-  
513 13206 (2004).
- 514 34 Whitfield, A. E. *et al.* A soluble form of the tomato spotted wilt virus (TSWV) glycoprotein  
515 G<sub>N</sub> (G<sub>N</sub>-S) inhibits transmission of TSWV by *Frankliniella occidentalis*. *Phytopathology*®  
516 **98**, 45-50, doi:10.1094/phyto-98-1-0045 (2008).
- 517 35 Bencharki, B. *et al.* Phloem protein partners of Cucurbit aphid borne yellows virus:  
518 possible involvement of phloem proteins in virus transmission by aphids. *Mol Plant*  
519 *Microbe Interact* **23**, 799-810, doi:10.1094/MPMI-23-6-0799 (2010).
- 520 36 Gildow, F. E. *et al.* Aphid acquisition and cellular transport of potato leafroll virus-like  
521 particles lacking P5 readthrough protein. *Phytopathology* **90**, 1153-1161,  
522 doi:10.1094/PHYTO.2000.90.10.1153 (2000).
- 523 37 Reinbold, C. *et al.* Studies on the role of the minor capsid protein in transport of Beet  
524 western yellows virus through *Myzus persicae*. *J. Gen. Virol.* **82**, 1995-2007 (2001).
- 525 38 Bruyere, A. *et al.* Effects of mutations in the beet western yellows virus readthrough  
526 protein on its expression and packaging and on virus accumulation, symptoms, and  
527 aphid transmission. *Virology* **230**, 323-334 (1997).
- 528 39 Walker, P. J. *et al.* Changes to virus taxonomy and to the International Code of Virus  
529 Classification and Nomenclature ratified by the International Committee on Taxonomy of  
530 Viruses (2021). *Archives of Virology* **166**, 2633-2648, doi:10.1007/s00705-021-05156-1  
531 (2021).
- 532 40 Shatters, R. G. *et al.* Compositions and methods for modifying a plant characteristic  
533 without modifying the plant genome. United States of America patent (2021).

534 41 Torti, S. *et al.* Transient reprogramming of crop plants for agronomic performance.  
535 *Nature Plants* **7**, 159-171, doi:10.1038/s41477-021-00851-y (2021).  
536

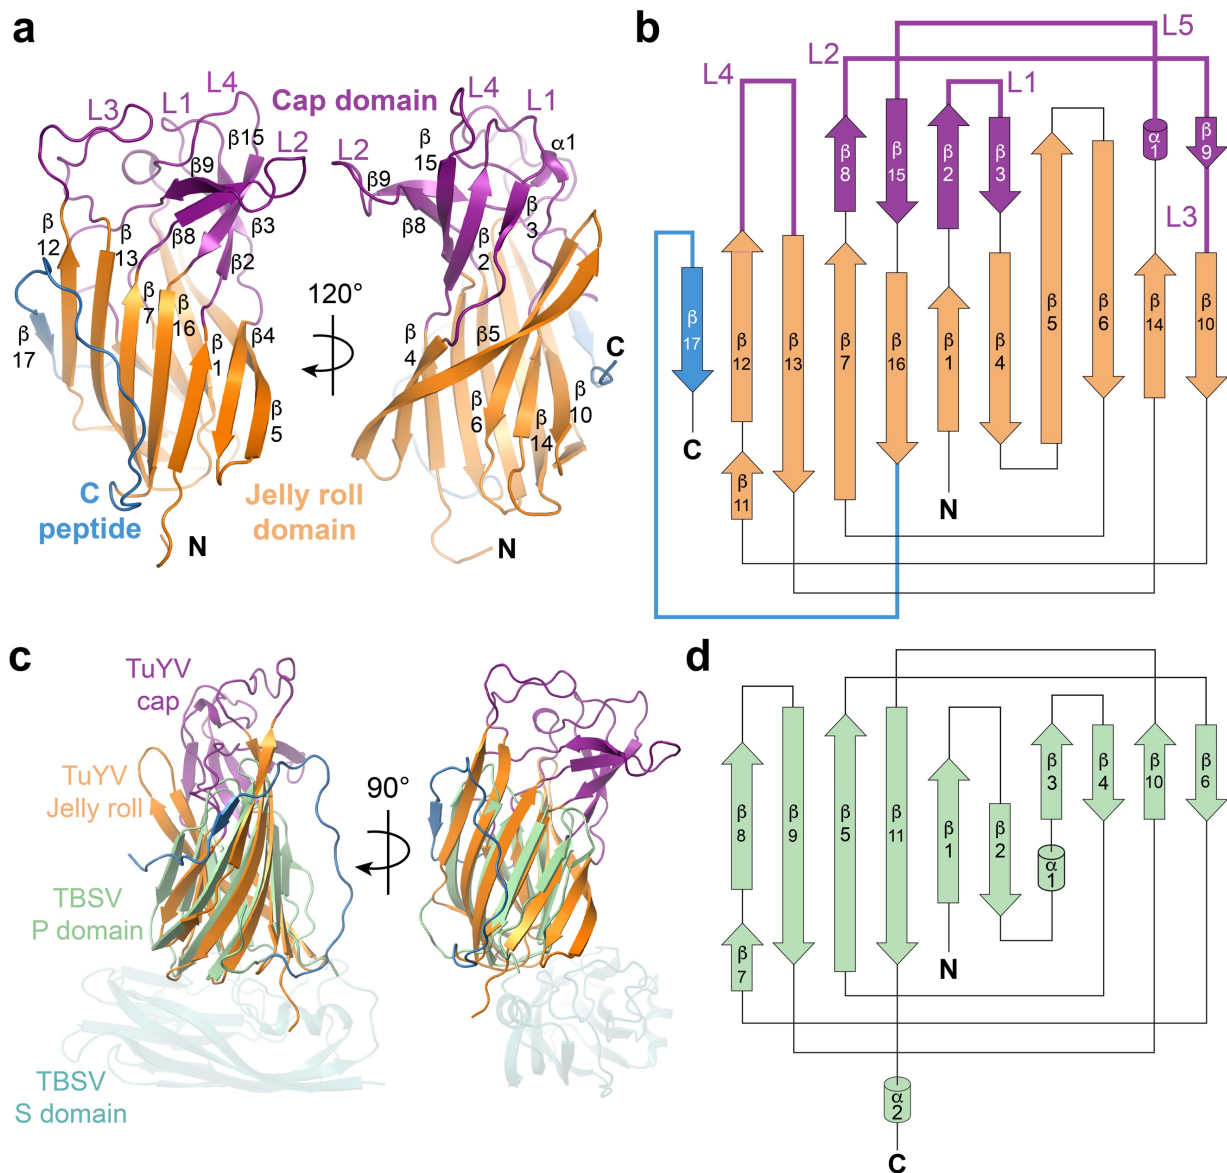

537

538 **Fig. 1. Structure and topology of the TuYV<sup>N</sup>RTD.** **a-b**, Structure (**a**) and topology (**b**) of TuYV  
 539 <sup>N</sup>RTD with jelly roll domain (orange), cap domain (purple) and C peptide (marine) labeled. Cap  
 540 domain loops are labeled L1-L5. **c**, Superposition of TuYV<sup>N</sup>RTD with tomato bushy stunt virus  
 541 (TBSV) coat protein (PDB: 2TBV; sequence identity: 9% (across the P domain); DALI<sup>26</sup> Z score:  
 542 7.0; RMSD: 2.7 Å; P domain, light green; S domain, teal). **d**, Topology of TBSV P domain.

543

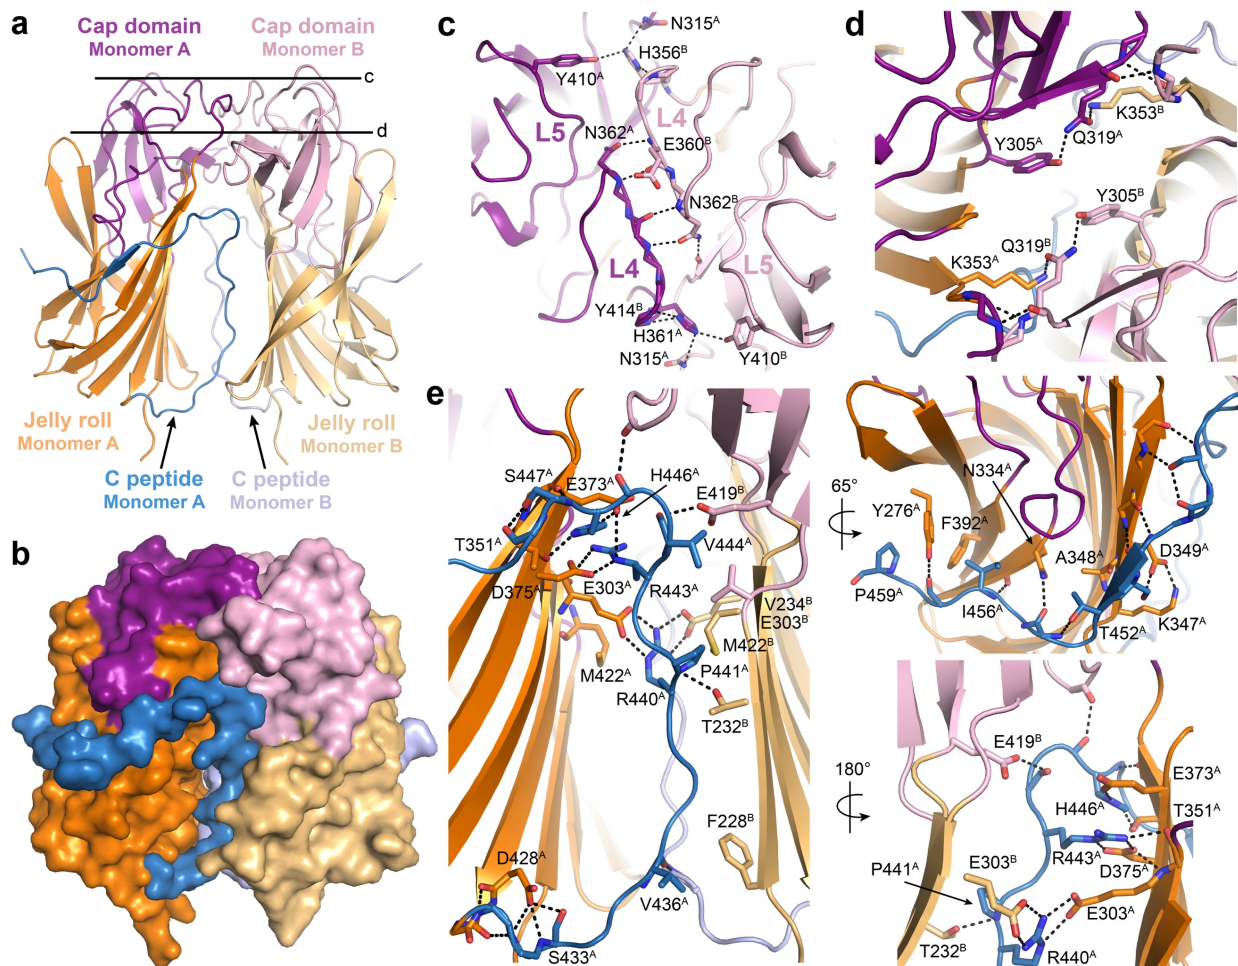

544

545 **Fig. 2. Architecture of the TuYV<sup>N</sup>RTD dimer.** **a-b**, Cartoon (**a**) and surface (**b**) representations  
546 of the TuYV<sup>N</sup>RTD dimer. Individual structural segments are labeled in each monomer and colored  
547 as follows: Jelly roll domains, orange and light orange; cap domains, purple and light pink; C  
548 peptides, marine and light blue. **c-d**, Slice sections through the dimer at the levels indicated by  
549 the solid lines in (**a**) highlighting stabilizing interactions at the dimer interface. Dashed black lines  
550 denote hydrogen bonds. Key residues are labeled with a superscript (A or B) to indicate from  
551 which monomer they originate. Secondary structure elements (see **Fig. 1**) are labeled where  
552 applicable. **e**, C peptide interactions. Residues contributing hydrogen bonding (dashed black  
553 lines) and hydrophobic contacts (dotted lines) are labeled.

554

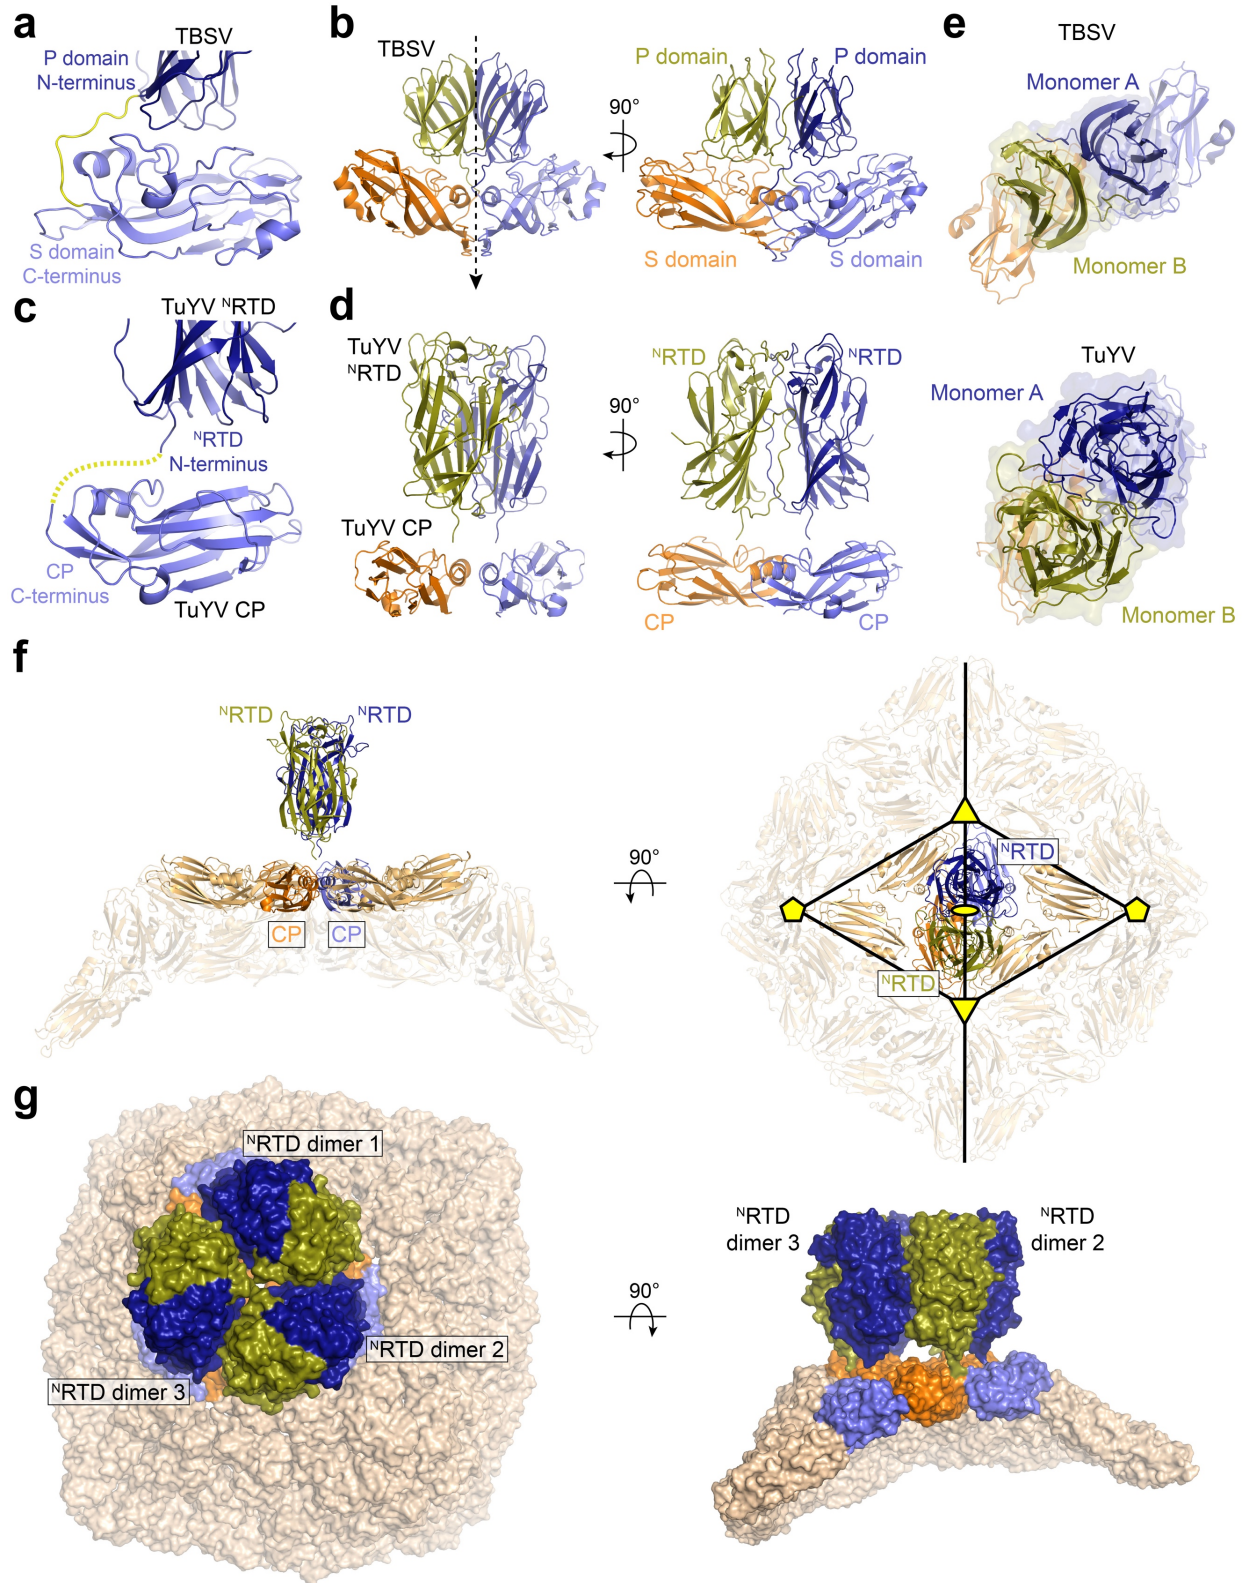

555

556 **Fig. 3. NRTD architecture does not limit stoichiometry in the context of the mature virion.**

557 **a, Domain connectivity in TBSV capsid proteins. Unstructured linker that connects the C-terminus**



558 of the S domain (light blue) to the N-terminus of the P domain (dark blue) highlighted in yellow.  
559 **b**, Arrangement of TBSV capsid proteins at the two-fold symmetry axis (dashed arrow) in the  
560 assembled virion (see **Fig. S2**) shown in two orientations. S and P domains associated with  
561 individual monomers are colored orange and olive (monomer A) and slate and dark blue  
562 (monomer B). **c**, Predicted connectivity in capsid proteins based on structural modeling. Dashed  
563 yellow line denotes the predicted trajectory linking the C-terminus of the TuYV CP (light blue,  
564 PDB: 6RTK) to the N-terminus of the TuYV <sup>N</sup>RTD (dark blue). **d**, Composite model of the  
565 poliovirus RTP built from the crystallized TuYV <sup>N</sup>RTD dimer and CP monomers taken from the  
566 cryo-EM reconstruction of modified TuYV virion devoid of the readthrough domain (PDB: 6RTK).  
567 RTP dimer is organized around two-fold symmetry axis analogous to the arrangement in **(b)** (see  
568 **Fig. S2**). **e**, View of subunit associations in **(b)** and **(d)** looking down the two-fold axis of symmetry  
569 in the direction of the dashed arrow in **(b)**. **f**, Side (left) and top down (right) views of TuYV RTP  
570 modeled at the two-fold symmetry axis of the icosahedral virion. Two-, three-, and five-fold  
571 symmetry axes are marked with a yellow ellipse, yellow triangles, and yellow pentagons,  
572 respectively. RTP is colored as in **(d)** with the rest of the capsid subunits colored wheat. **g**, Model  
573 illustrating the feasible positioning of <sup>N</sup>RTD dimers (olive and dark blue) around icosahedral  
574 asymmetric unit of PLVR VLP assuming the structural organization in **(d)**. Associated CP  
575 monomers are colored orange and slate with the rest of the capsid surface colored wheat.

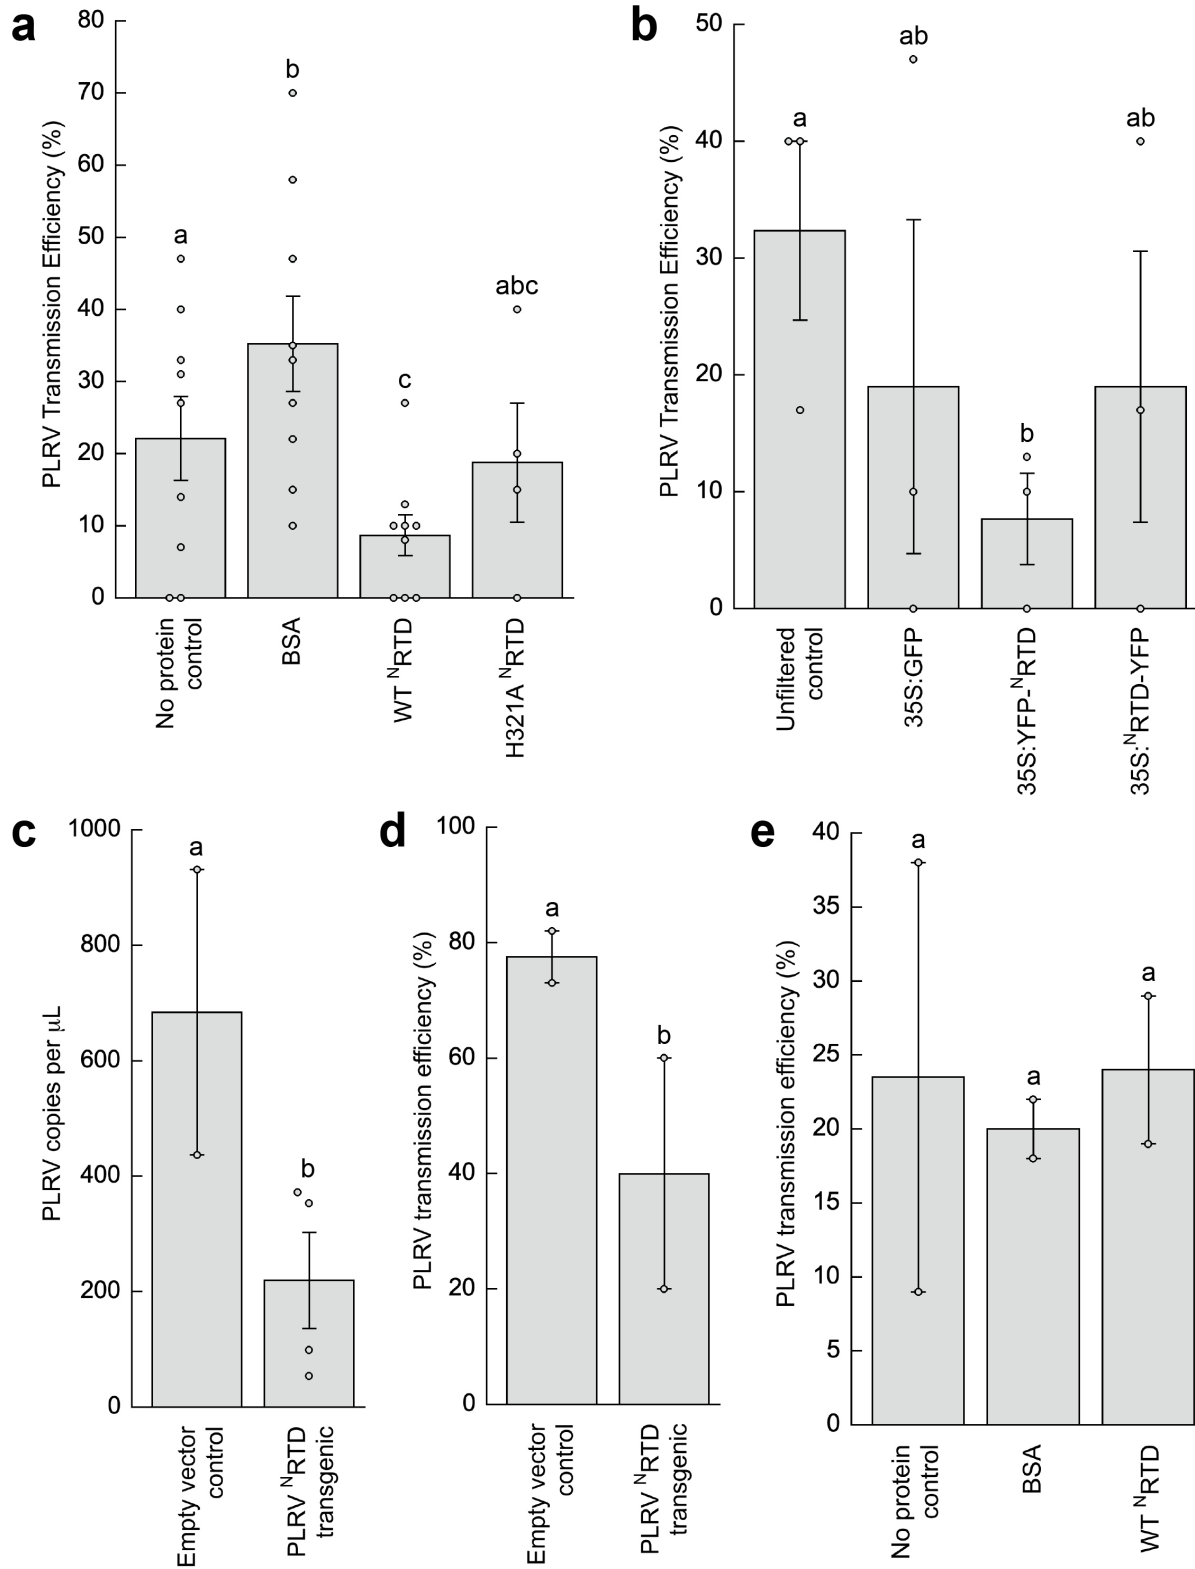

576

577 **Fig 4. The <sup>NRTD</sup> can function as an inhibitor of viral transmission. a**, The PLRV transmission

578 efficiency of *Myzus persicae* is significantly different after feeding on various artificial diet

579 treatments (see **Fig. S9a**): no protein control ( $n = 101$ ), BSA ( $n = 116$ ), purified WT PLRV<sup>NRTD</sup>  
580 ( $n = 124$ ), or PLRV<sup>NRTD</sup> point mutant H321A ( $n = 43$ ). **b**, PLRV transmission efficiency of *M.*  
581 *persicae* aphids is reduced after transient *in planta* delivery of the PLRV<sup>NRTD</sup> ( $n = 37$  for all  
582 treatments, see **Fig. S10**). **c**, Aphid acquisition of PLRV is reduced after exposure to the PLRV  
583<sup>NRTD</sup> transgenic ( $n = 4$ ) compared to empty vector control ( $n = 2$ ) potato plants as quantified via  
584 droplet digital PCR (see **Fig. S11**). Mean  $\pm$  one standard error for all replicates (dots) is shown.  
585 Letters above each bar represent significantly different treatments ( $P < 0.05$ ) by Student's *t* test.  
586 **d**, PLRV transmission efficiency of *M. persicae* aphids is reduced after exposure to the PLRV  
587<sup>NRTD</sup> transgenic ( $n = 60$ ) compared to empty vector control ( $n = 26$ ) potato plants (see **Fig. S11**).  
588 **e**, The PLRV transmission efficiency of *M. persicae* is unaltered after microinjection with the no  
589 protein (buffer) control ( $n = 19$ ), or two concentrations each (0.1 mg/mL and 1 mg/mL) of BSA ( $n$   
590 = 40) or purified PLRV<sup>NRTD</sup> ( $n = 38$ ). For panels (**a**), (**b**), (**d**), and (**e**), the mean  $\pm$  one standard  
591 error for all independent repeats of the experiment (dots) is shown. Each inoculated plant was  
592 considered a replicate. Letters above each bar represent significantly different treatments ( $P <$   
593 0.05) by logistic regression analysis.

594

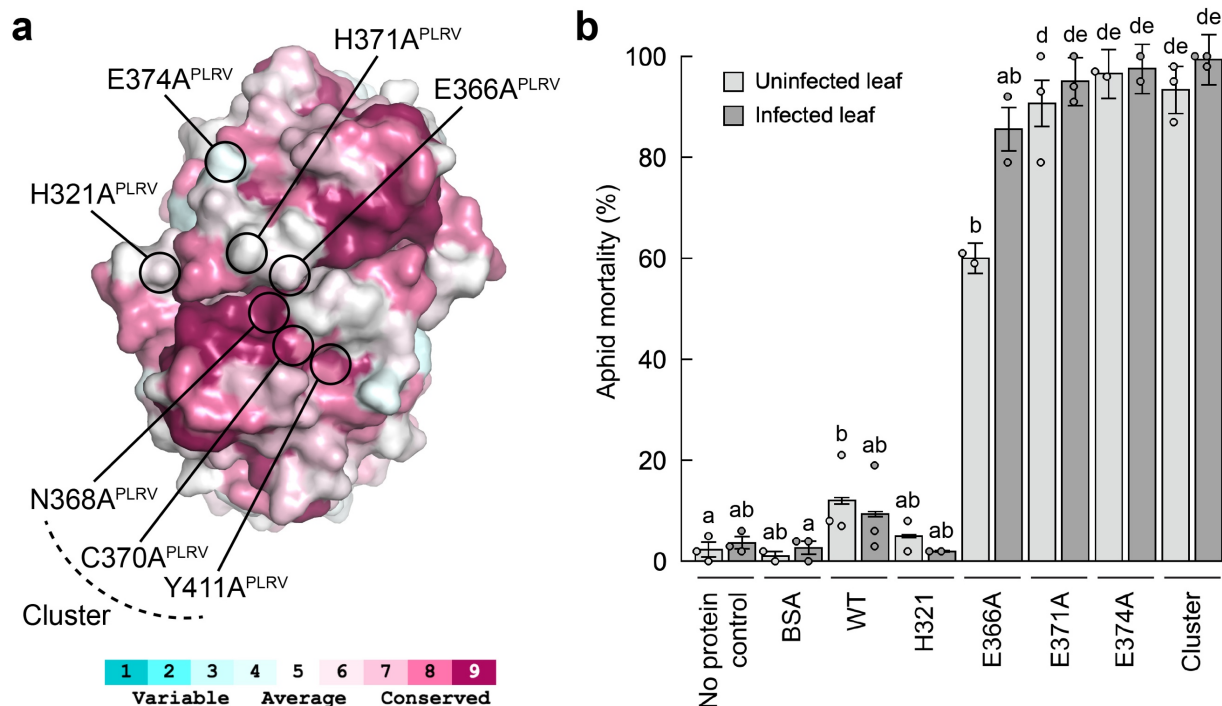

595

596 **Fig. 5. Cap domain mutants are lethal to aphids.** **a**, Top view of TuYV <sup>N</sup>RTD dimer illustrating  
597 positions of PLRV cap domain mutants. Coloring reflects sequence conservation among polero-,  
598 enamo-, and luteoviruses (legend below, see also **Data S1** and **Fig. S7**) and was generated using  
599 the ConSurf Server<sup>29</sup>. **b**, *Myzus persicae* mortality after feeding on 0.1 mg/mL of BSA ( $n = 232$ ),  
600 purified WT PLRV <sup>N</sup>RTD ( $n = 247$ ), PLRV <sup>N</sup>RTD point mutants H321A ( $n = 183$ ), E366A ( $n = 118$ ),  
601 H371A ( $n = 264$ ), E374A ( $n = 161$ ), a PLRV <sup>N</sup>RTD cluster mutant (containing mutations N368A,  
602 C370A, and Y411A;  $n = 256$ ) or no protein controls ( $n = 244$ ) for 48 hours and then moved to an  
603 uninfected (light gray) or PLRV-infected (dark gray) detached hairy nightshade leaf (See **Fig.**  
604 **S9b**). Mean  $\pm$  one standard error for all independent repeats of the experiment (dots) is shown.  
605 Each individual aphid was considered a replicate. Different letters represent significantly different  
606 treatments ( $P < 0.05$ ) by logistic regression analysis.

607
